# Supplementary material for: Colour-tunable quantum dots/poly(NIPAM-co-AAc) hybrid microgels based on electrostatic interactions
Source: Royal Society of Chemistry journal article supplement (doi:10.1039/c6ra19659d), 2016-01-01
Supplement: c6ra19659d1.pdf [file c6ra19659d1.pdf]

## Colour-Tunable Quantum Dots/Poly(NIPAM-co-AAc) Hybrid Microgels Based on Electrostatic Interactions

Yuting Cai<sup>a,b</sup>, Gaolai Du<sup>a</sup>, Guorong Gao<sup>a</sup>, Jing Chen<sup>\*a</sup>, and Jun Fu<sup>\*a</sup>

<sup>a</sup> Division of Polymer and Composite Materials, Ningbo Institute of Material Technology and Engineering, Chinese Academy of Science, 1219 Zhongguan West Road, Ningbo 315201, P.R. China.

<sup>b</sup> Department of Chemistry, School of Science, North University of China, Taiyuan 030051, Shanxi Province, P.R. China.

E-mail: jing.chen@nimte.ac.cn (J. C.); fujun@nimte.ac.cn (J. F.)

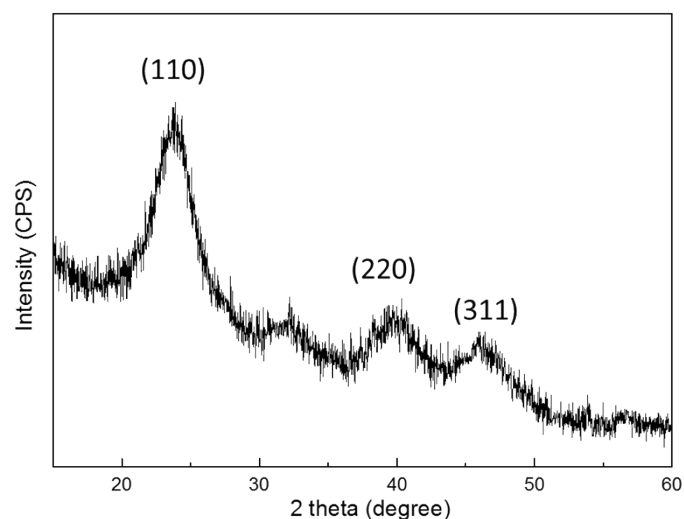

Fig. S1 XRD pattern of CA-CdTe QDs at reflux time of 60 min.

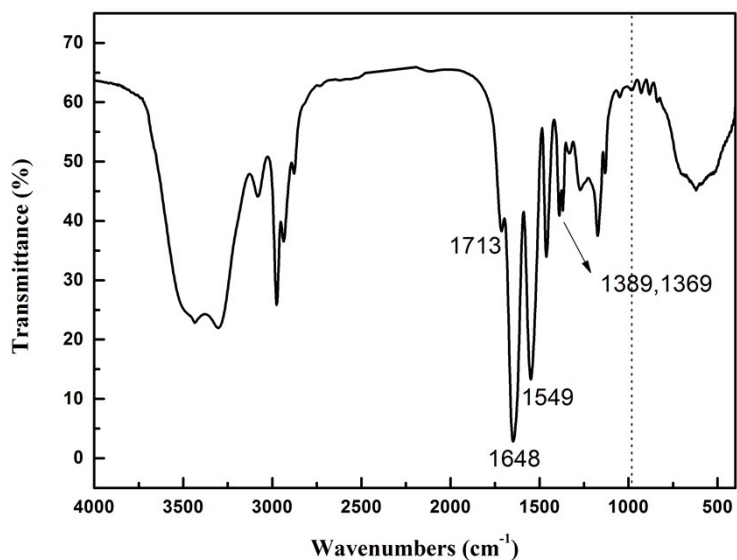

Fig. S2 FTIR spectrum of poly(NIPAM-co-AAc) microgels.

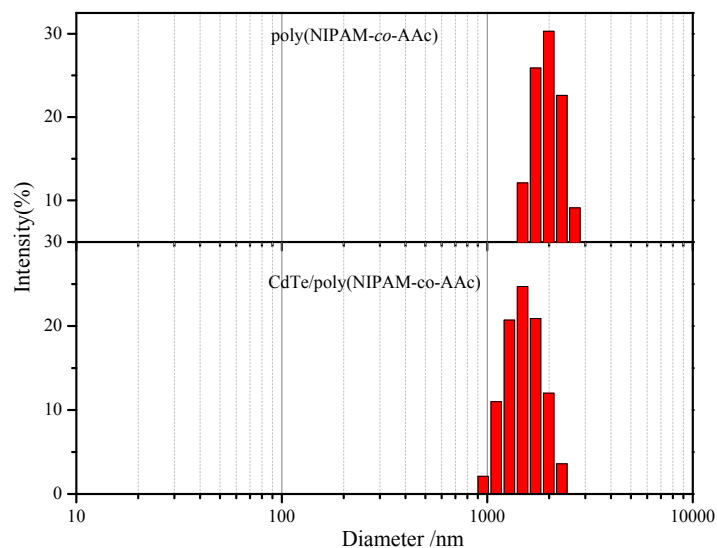

**Fig. S3** Dynamic light scattering (DLS) histograms of poly(NIPAM-co-AAc) microgels and hybrid microgels determined at 25°C, pH = 4.

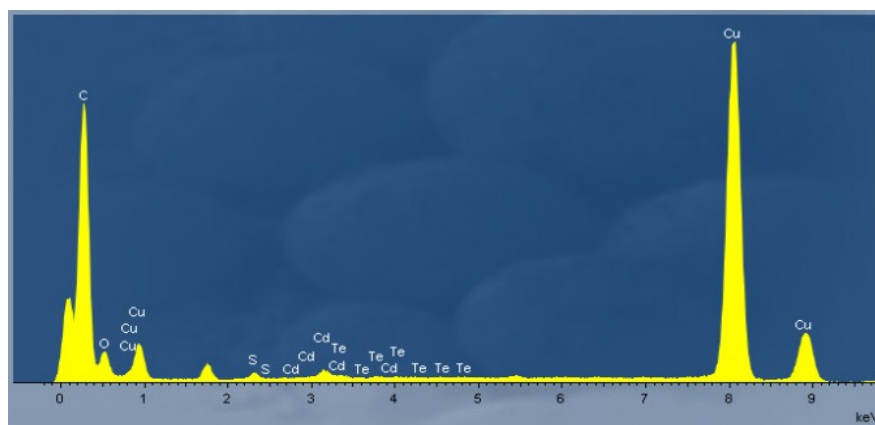

**Fig. S4** EDX spectrum of the CdTe/poly(NIPAM-co-AAc) microgels.
